# Supplementary material for: mRNA association by aminoacyl tRNA synthetase occurs at a putative anticodon mimic and autoregulates translation in response to tRNA levels
Source: PubMed Central journal article supplement (PMC6542539; doi:10.1371/journal.pbio.3000274), 2019-05-17
Supplement: pbio.3000274.s004.pdf [file pbio.3000274.s004.pdf]

| Gene            | Amino Acid | local   | Mitchell et al <sup>11</sup> | Beckmann et al <sup>7</sup> | Matia-González et al <sup>10</sup> |
|-----------------|------------|---------|------------------------------|-----------------------------|------------------------------------|
| HTS1 / YPR033C  | His        | Cyt+Mit | V                            | V                           | V                                  |
| GUS1 / YGL245W  | Glu        | Cyt     | V                            | V                           | V                                  |
| GLN4 / YOR168W  | Gln        | Cyt+Mit | V                            | V                           | V                                  |
| TYS1 / YGR185C  | Tyr        | Cyt     | V                            | V                           | V                                  |
| KRS1 / YDR037W  | Lys        | Cyt     | V                            | V                           | V                                  |
| SES1 / YDR023W  | Ser        | Cyt     | -                            | V                           | V                                  |
| MES1 / YGR264C  | Met        | Cyt     | -                            | V                           | V                                  |
| THS1 / YIL078W  | Thr        | Cyt     | -                            | V                           | V                                  |
| VAS1 / YGR094W  | Val        | Cyt+Mit | -                            | V                           | V                                  |
| YHR020W         | Pro        | Cyt     | -                            | V                           | V                                  |
| CDC60 / YPL160W | Leu        | Cyt     | -                            | V                           | V                                  |
| DED81 / YHR019C | Asn        | Cyt     | -                            | V                           | V                                  |
| DPS1 / YLL018C  | Asp        | Cyt     | -                            | V                           | V                                  |
| YDR341C         | Arg        | Cyt     | -                            | V                           | V                                  |
| ILS1/ YBL076c   | Ile        | Cyt     | -                            | V                           | V                                  |
| ALA1 / YOR335C  | Ala        | Cyt+Mit | -                            | V                           | V                                  |
| FRS2 / YFL022C  | Phe        | Cyt     | -                            | V                           | V                                  |
| FRS1 / YLR060W  | Phe        | Cyt     | -                            | -                           | V                                  |
| WRS1 / YOL097C  | Trp        | Cyt     | -                            | -                           | V                                  |
| GRS1 / YBR121C  | Gly        | Cyt+Mit | -                            | -                           | V                                  |
| YNL247W         | Cys        | Cyt     | -                            | V                           | -                                  |
| SLM5 / YCR024C  | Asn        | Mit     | -                            | -                           | -                                  |
| MST1 / YKL194C  | Thr        | Mit     | -                            | -                           | -                                  |
| MSR1 / YHR091C  | Arg        | Mit     | -                            | -                           | -                                  |
| ISM1 / YPL040C  | Ile        | Mit     | -                            | -                           | -                                  |
| MSF1 / YPR047W  | Phe        | Mit     | -                            | -                           | -                                  |
| NAM2 / YLR382C  | Leu        | Mit     | -                            | -                           | -                                  |
| MSE1 / YOL033W  | Glu        | Mit     | -                            | -                           | -                                  |
| MSK1 / YNL073W  | Lys        | Mit     | -                            | -                           | -                                  |
| MSY1 / YPL097W  | Tyr        | Mit     | -                            | -                           | -                                  |
| MSW1 / YDR268W  | Trp        | Mit     | -                            | -                           | -                                  |
| MSM1 / YGR171C  | Met        | Mit     | -                            | -                           | -                                  |
